# Supplementary material for: Optimization of a Three-Dimensional Culturing Method for Assessing the Impact of Cisplatin on Notch Signaling in Head and Neck Squamous Cell Carcinoma (HNSCC)
Source: Cancers (Basel). 2023 Nov 7;15(22):5320. doi: 10.3390/cancers15225320 (PMC10670464; doi:10.3390/cancers15225320)
Supplement: Supplementary file 1 [file cancers-15-05320-s001.zip]

Archive with 5 entries (5 files):
- Anameric et al 2023 Supplemental Figures.pdf
- supplemental video S1 - UTSCC-42B MONOCULTURE SANDWICH.avi
- supplemental video S2 - UTSCC-42B COCULTURE SANDWICH.avi
- supplemental video S3 - UTSCC-42B MONOCULTURE 3D SHEET.avi
- supplemental video S4 - UTSCC-42B COCULTURE 3D SHEET.avi
